# Supplementary material for: Oxidation of refractory sulfur compounds with molecular oxygen over a Ce–Mo–O catalyst
Source: Royal Society of Chemistry journal article supplement (doi:10.1039/c6gc01357k), 2016-01-01
Supplement: c6gc01357k1.pdf [file c6gc01357k1.pdf]

Supplementary Materials for

**Oxidation of refractory sulfur compounds with molecular oxygen over Ce-Mo-O catalyst**

Yawei Shi, Guozhu Liu\*, Bofeng Zhang and Xiangwen Zhang\*

*Key Laboratory for Green Chemical Technology of Ministry of Education, School of Chemical Engineering and Technology, Collaborative Innovation Center of Chemical Science and Engineering (Tianjin), Tianjin University, Tianjin 300072, China*

\*Corresponding author. Tel. /fax: +86 22 27892340.

E-mail address: gliu@tju.edu.cn (G. Liu); zhangxiangwen@tju.edu.cn (X. Zhang)

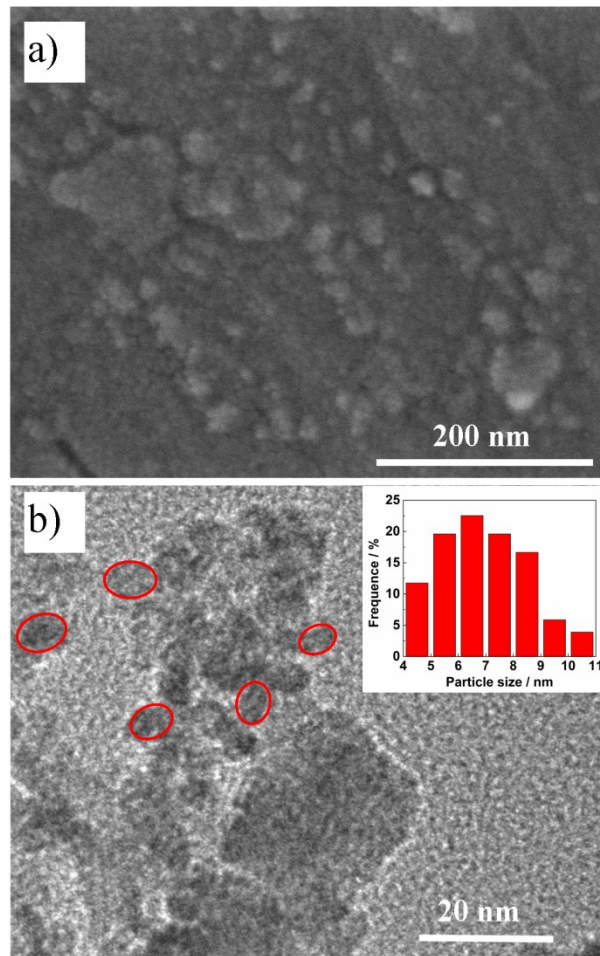

Fig. S1 SEM (a), TEM images (b) and particle size distribution of the catalyst (b inset)

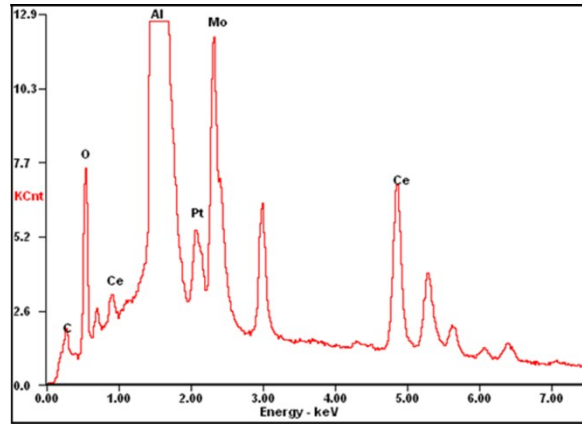

Fig. S2 EDS spectrum of the Ce-Mo-O catalyst

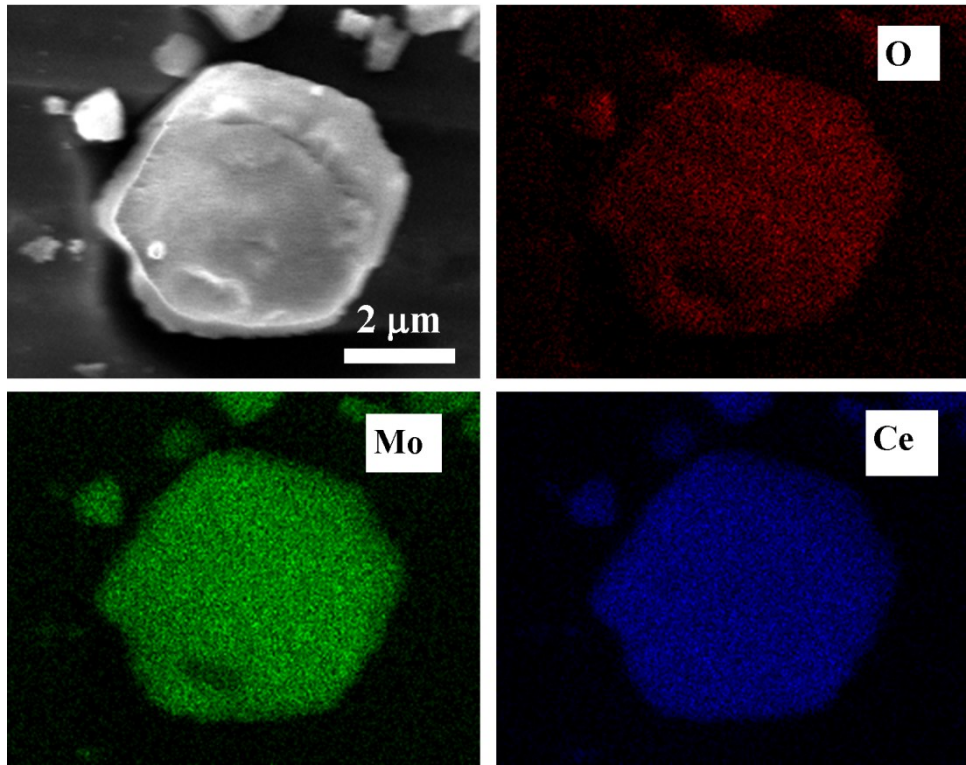

Fig.S3 EDS mapping of the Ce-Mo-O catalyst

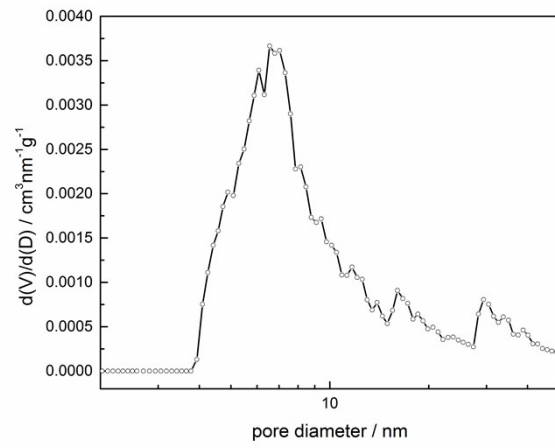

Fig.S4 mesopore size distribution of the catalyst

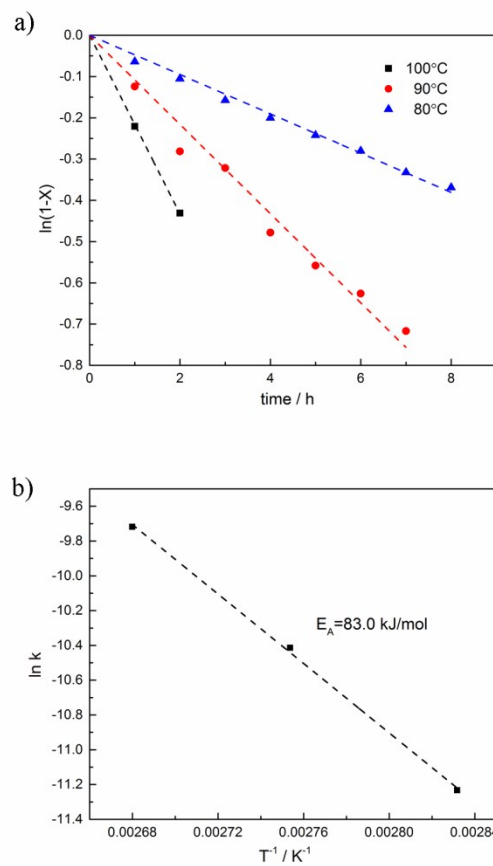

Fig.S5 Pseudo-first-order fitting of the kinetic data (a) and calculation of Arrhenius equation (b).

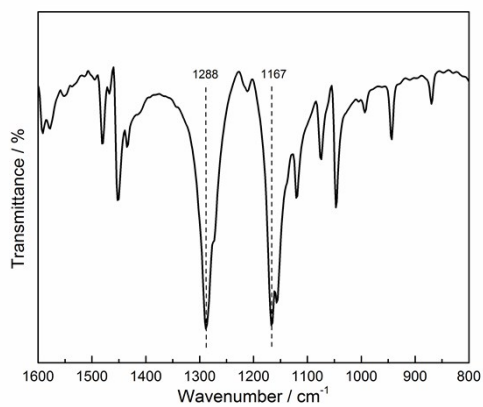

Fig.S6 FT-IR spectrum of the oxidation product

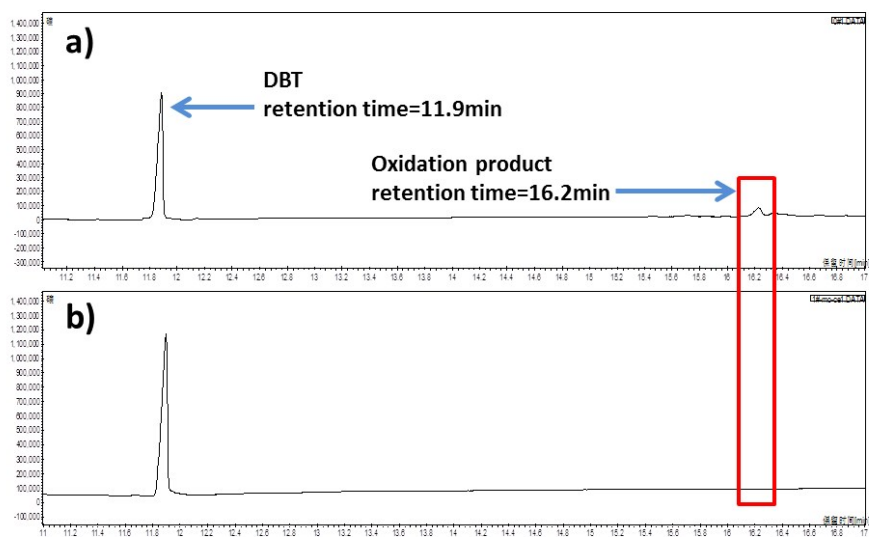

Fig.S7 GC-FID analysis of control experiments (reaction conditions: 100°C, 500ppmW DBT in 20g decalin, O<sub>2</sub> bubbled in at ambient pressure)
